# Supplementary material for: Minor PNH clones do not distinguish inherited bone marrow failure syndromes from immune-mediated aplastic anemia
Source: PubMed Central journal article supplement — Blood Adv. 2022 Apr 19;6(8):2517–9. doi: 10.1182/bloodadvances.2021006044 (PMC9043929; doi:10.1182/bloodadvances.2021006044), 2022-04-19
Supplement: advancesADV2021006044-suppl1.pdf [file advancesADV2021006044-suppl1.pdf]

## Supplemental Figure

**A**

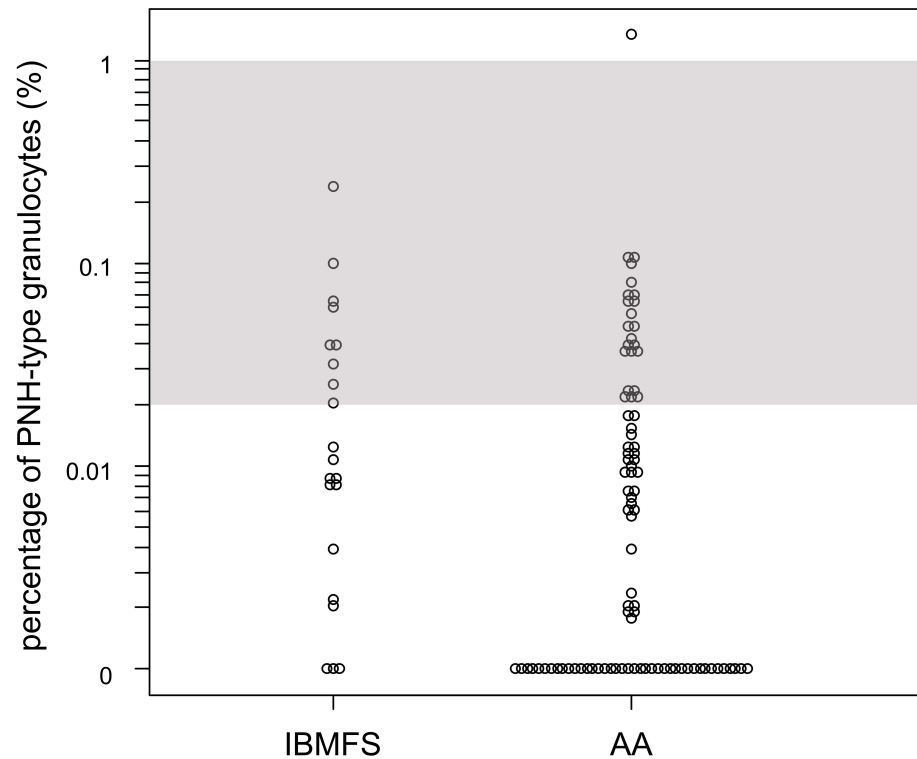

**B**

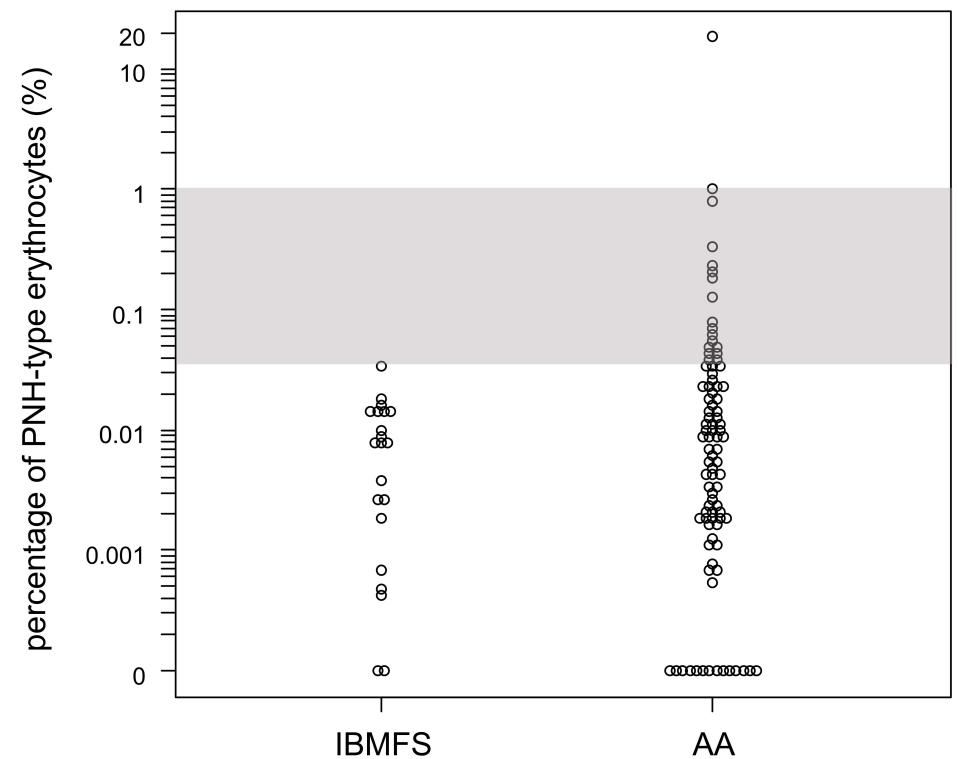

**Supplemental Figure.** The proportions of CD11b+ CD55– CD59– granulocytes (A) and glycophorin A+ CD55– CD59– erythrocytes (B) in each patient group. Minor PNH clones were defined as the presence of 0.02% to 1% of PNH-type granulocytes and 0.037% to 1% of PNH-type erythroblasts.
